# Supplementary material for: Extractive Distillation Approach to the Separation of Styrene from Pyrolysis Gasoline Feedstock Coupled with Deep Desulfurization
Source: MDPI journal article supplement (doi:10.3390/separations10060341), 2023-06-01
Supplement: s1 [file s1]

**Extractive Distillation Approach to the Separation of Styrene from Cracking  
Gasoline Feedstock Coupled with Deep Desulfurization**

Guanchu Guo <sup>1,a</sup>, Chuanlei Liu <sup>1,a</sup>, Yuxiang Chen <sup>a</sup>, Qiyue Zhao <sup>a</sup>, Weikang Gao <sup>a</sup>, Hao  
Wang <sup>a</sup>, Fengjing Yang <sup>a</sup>, Benxian Shen <sup>a,b</sup>, Di Wu <sup>c,d,e,f</sup>, Hui Sun <sup>a,b,\*</sup>

<sup>a</sup> *School of Chemical Engineering, East China University of Science and Technology,  
Shanghai 200237, China*

<sup>b</sup> *International Joint Research Center of Green Energy Chemical Engineering, East  
China University of Science and Technology, Shanghai 200237, China*

<sup>c</sup> *Alexandra Navrotsky Institute for Experimental Thermodynamics, Washington State  
University, Pullman, Washington 99163, United States*

<sup>d</sup> *The Gene and Linda Voiland School of Chemical Engineering and Bioengineering,  
Washington State University, Pullman, Washington 99163, United States*

<sup>e</sup> *Materials Science and Engineering, Washington State University, Pullman,  
Washington 99163, United States*

<sup>f</sup> *Department of Chemistry, Washington State University, Pullman, Washington 99163,  
United States*

\* Corresponding Author Email: [sunhui@ecust.edu.cn](mailto:sunhui@ecust.edu.cn)

**Table S1.** Division of the system component groups.

|                                 | <b>Name</b>           | <b>Molecular formula</b>                       | <b>Group division</b>                                   |
|---------------------------------|-----------------------|------------------------------------------------|---------------------------------------------------------|
| Compounds<br>in the<br>solution | Octane                | C <sub>8</sub> H <sub>18</sub>                 | 2CH <sub>3</sub> ,6CH <sub>2</sub>                      |
|                                 | 1-Octene              | C <sub>8</sub> H <sub>16</sub>                 | 1CH <sub>3</sub> ,5CH <sub>2</sub> ,CH <sub>2</sub> =C  |
|                                 | Ethylbenzene          | C <sub>8</sub> H <sub>10</sub>                 | 1CH <sub>3</sub> ,5ACH,1ACCH <sub>3</sub>               |
|                                 | P-xylene              | C <sub>8</sub> H <sub>10</sub>                 | 4ACH,2ACCH <sub>3</sub>                                 |
|                                 | M-xylene              | C <sub>8</sub> H <sub>10</sub>                 | 4ACH,2ACCH <sub>3</sub>                                 |
|                                 | O-xylene              | C <sub>8</sub> H <sub>10</sub>                 | 4ACH,2ACCH <sub>3</sub>                                 |
|                                 | Phenylacetylene       | C <sub>8</sub> H <sub>6</sub>                  | 5ACH,1CH≡C                                              |
|                                 | Styrene               | C <sub>8</sub> H <sub>8</sub>                  | 5ACH,1AC,1CH <sub>2</sub> =CH                           |
|                                 | Cumene                | C <sub>9</sub> H <sub>12</sub>                 | 5ACH,2CH <sub>3</sub> ,1ACCH                            |
|                                 | n-Nonane              | C <sub>9</sub> H <sub>20</sub>                 | 2CH <sub>3</sub> ,7CH <sub>2</sub>                      |
|                                 | 1-Pentanethiol        | C <sub>5</sub> H <sub>12</sub> S               | 1CH <sub>3</sub> ,3CH <sub>2</sub> ,1CH <sub>2</sub> SH |
|                                 | Dipropyl sulfide      | C <sub>6</sub> H <sub>14</sub> S               | 2CH <sub>3</sub> ,3CH <sub>2</sub> ,1CH <sub>2</sub> S  |
|                                 | 3,4-Dimethylthiophene | C <sub>6</sub> H <sub>8</sub> S                | 2ACCH <sub>3</sub> ,1CH,1CHS                            |
| Extractant                      | SUL                   | C <sub>4</sub> H <sub>8</sub> O <sub>2</sub> S | 1SULFOLANE                                              |
|                                 | DMSO                  | C <sub>2</sub> H <sub>6</sub> OS               | 1Me <sub>2</sub> SO                                     |
|                                 | BAZ                   | C <sub>7</sub> H <sub>9</sub> N                | 5ACH,1CH <sub>2</sub> NH <sub>2</sub>                   |
|                                 | DEG                   | C <sub>4</sub> H <sub>10</sub> O <sub>3</sub>  | 2OH,3CH <sub>2</sub> ,1CH <sub>2</sub> O                |
|                                 | NMP                   | C <sub>5</sub> H <sub>9</sub> NO               | 1NMP                                                    |
|                                 | γ-BL                  | C <sub>4</sub> H <sub>6</sub> O <sub>2</sub>   | 2CH <sub>2</sub> ,1CH <sub>2</sub> COO                  |
|                                 | Water                 | H <sub>2</sub> O                               | 1H <sub>2</sub> O                                       |

**Table S2.** Volume and surface area parameters of the component groups.

| <b>Group</b>                    | <b><math>R_K</math></b> | <b><math>Q_K</math></b> |
|---------------------------------|-------------------------|-------------------------|
| CH                              | 0.4469                  | 0.228                   |
| CH <sub>2</sub>                 | 0.6744                  | 0.540                   |
| CH <sub>3</sub>                 | 0.9011                  | 0.848                   |
| CH <sub>2</sub> =CH             | 1.3454                  | 1.176                   |
| CH≡C                            | 1.2920                  | 1.088                   |
| AC                              | 0.3652                  | 0.120                   |
| ACH                             | 0.5313                  | 0.400                   |
| ACCH                            | 0.8121                  | 0.348                   |
| ACCH <sub>3</sub>               | 1.2663                  | 0.968                   |
| CH <sub>2</sub> COO             | 1.6764                  | 1.420                   |
| CH <sub>2</sub> S               | 1.3863                  | 1.060                   |
| CH <sub>2</sub> SH              | 1.6510                  | 1.368                   |
| CH <sub>2</sub> NH <sub>2</sub> | 1.3692                  | 1.236                   |
| Me <sub>2</sub> SO              | 2.8266                  | 2.827                   |
| NMP                             | 2.8266                  | 3.200                   |
| SULFOLANE                       | 4.0358                  | 3.200                   |
| OH                              | 1.0000                  | 1.200                   |
| H <sub>2</sub> O                | 0.9200                  | 1.400                   |

**Table S3.** Composition of the main streams.

| <b>Components</b>     | <b>F1 stream</b> | <b>F2 stream</b> |
|-----------------------|------------------|------------------|
| Octane                | 9.251            | 0                |
| 1-Octene              | 2.256            | 0                |
| Ethylbenzene          | 13.117           | 0                |
| P-xylene              | 7.822            | 0.02             |
| M-xylene              | 19.103           | 0.02             |
| O-xylene              | 10.940           | 0.07             |
| Phenylacetylene       | 0.001            | 0                |
| Styrene               | 36.552           | 99.78            |
| Cumene                | 0.050            | 0.11             |
| n-Nonane              | 0.883            | 0                |
| 1-Pentanethiol        | 0.008            | 0                |
| Dipropyl sulfide      | 0.008            | 0                |
| 3,4-Dimethylthiophene | 0.008            | 0                |

**Table S4.** Activity coefficients of styrene (STY), o-xylene (OX), and 3,4-dimethylthiophene (3,4-DT) in the different solvents.

| S/L | SUL            |               |                   |               |
|-----|----------------|---------------|-------------------|---------------|
|     | $\gamma_{STY}$ | $\gamma_{ox}$ | $\gamma_{3,4-DT}$ | $\gamma_{DS}$ |
| 3   | 1.6519         | 1.8524        | 1.3435            | 2.4888        |
| 4   | 1.7709         | 2.0268        | 1.3972            | 2.8432        |
| 5   | 1.8567         | 2.1551        | 1.4353            | 3.1222        |
| 6   | 1.9201         | 2.2509        | 1.4635            | 3.3443        |
| 7   | 1.9679         | 2.3237        | 1.4850            | 3.5232        |
| 8   | 2.0046         | 2.3797        | 1.5019            | 3.6690        |
| 9   | 2.0332         | 2.4234        | 1.5155            | 3.7892        |
| S/L | DMSO           |               |                   |               |
|     | $\gamma_{STY}$ | $\gamma_{ox}$ | $\gamma_{3,4-DT}$ | $\gamma_{DS}$ |
| 3   | 2.1152         | 3.4387        | 2.2766            | 3.6634        |
| 4   | 2.3077         | 3.8722        | 2.4883            | 4.2538        |
| 5   | 2.4484         | 4.1993        | 2.6422            | 4.7081        |
| 6   | 2.5549         | 4.4544        | 2.7586            | 5.0641        |
| 7   | 2.6380         | 4.6585        | 2.8493            | 5.3483        |
| 8   | 2.7046         | 4.8255        | 2.9219            | 5.5792        |
| 9   | 2.7589         | 4.9646        | 2.9811            | 5.7698        |
| S/L | BAZ            |               |                   |               |
|     | $\gamma_{STY}$ | $\gamma_{ox}$ | $\gamma_{3,4-DT}$ | $\gamma_{DS}$ |
| 3   | 1.1422         | 1.2422        | 1.0749            | 1.2623        |
| 4   | 1.1607         | 1.2873        | 1.0844            | 1.3031        |
| 5   | 1.1737         | 1.3207        | 1.0910            | 1.3326        |
| 6   | 1.1832         | 1.3464        | 1.0959            | 1.3547        |
| 7   | 1.1905         | 1.3667        | 1.0996            | 1.3720        |
| 8   | 1.1962         | 1.3831        | 1.1025            | 1.3858        |
| 9   | 1.2009         | 1.3967        | 1.1048            | 1.3971        |
| S/L | DEG            |               |                   |               |
|     | $\gamma_{STY}$ | $\gamma_{ox}$ | $\gamma_{3,4-DT}$ | $\gamma_{DS}$ |
| 3   | 1.0082         | 1.0073        | 1.0021            | 2.7888        |
| 4   | 1.0082         | 4.4221        | 4.7656            | 3.0758        |
| 5   | 5.3356         | 4.7541        | 5.0809            | 3.2810        |
| 6   | 5.6571         | 4.9974        | 5.3076            | 3.4331        |
| 7   | 5.8999         | 5.1806        | 5.4758            | 3.5493        |
| 8   | 6.0865         | 5.3216        | 5.6039            | 3.6402        |
| 9   | 6.2322         | 5.4322        | 5.7035            | 3.7129        |
| S/L | NMP            |               |                   |               |
|     | $\gamma_{STY}$ | $\gamma_{ox}$ | $\gamma_{3,4-DT}$ | $\gamma_{DS}$ |
| 3   | 1.0897         | 1.1503        | 1.4429            | 1.7660        |
| 4   | 1.1012         | 1.1733        | 1.5015            | 1.8978        |
| 5   | 1.1092         | 1.1896        | 1.5423            | 1.9939        |
| 6   | 1.1150         | 1.2017        | 1.5722            | 2.0666        |
| 7   | 1.1195         | 1.2111        | 1.5950            | 2.1233        |
| 8   | 1.1230         | 1.2185        | 1.6130            | 2.1686        |
| 9   | 1.1259         | 1.2246        | 1.6274            | 2.2056        |

| S/L | $\gamma$ -BL   |               |                   |               |
|-----|----------------|---------------|-------------------|---------------|
|     | $\gamma_{STY}$ | $\gamma_{ox}$ | $\gamma_{3,4-DT}$ | $\gamma_{DS}$ |
| 3   | 0.9845         | 1.2718        | 1.0364            | 1.1080        |
| 4   | 0.9828         | 1.3164        | 1.0416            | 1.1269        |
| 5   | 0.9817         | 1.3496        | 1.0453            | 1.1407        |
| 6   | 0.9809         | 1.3752        | 1.0481            | 1.1512        |
| 7   | 0.9803         | 1.3955        | 1.0502            | 1.1594        |
| 8   | 0.9798         | 1.4121        | 1.0519            | 1.1660        |
| 9   | 0.9795         | 1.4258        | 1.0533            | 1.1715        |

**Table S5.** Selectivity of each solvent for the systems of o-xylene/styrene, 3,4-dimethylthiophene/styrene, and dipropyl sulfur/styrene.

| S/L | O-Xylene/Styrene              |        |        |        |        |              |
|-----|-------------------------------|--------|--------|--------|--------|--------------|
|     | SUL                           | DMSO   | BAZ    | DEG    | NMP    | $\gamma$ -BL |
| 3   | 1.2911                        | 1.1490 | 1.0609 | 0.8776 | 1.1725 | 1.0238       |
| 4   | 1.3193                        | 1.1457 | 1.0819 | 0.8712 | 1.1889 | 1.0315       |
| 5   | 1.3385                        | 1.1437 | 1.0977 | 0.8692 | 1.2003 | 1.0374       |
| 6   | 1.3524                        | 1.1424 | 1.1101 | 0.8617 | 1.2087 | 1.0421       |
| 7   | 1.3629                        | 1.1414 | 1.1199 | 0.8566 | 1.2152 | 1.0458       |
| 8   | 1.3710                        | 1.1407 | 1.1279 | 0.8529 | 1.2203 | 1.0489       |
| 9   | 1.3775                        | 1.1402 | 1.1346 | 0.8503 | 1.2244 | 1.0514       |
| S/L | 3,4-Dimethylthiophene/Styrene |        |        |        |        |              |
|     | SUL                           | DMSO   | BAZ    | DEG    | NMP    | $\gamma$ -BL |
| 3   | 0.8264                        | 1.0935 | 0.9562 | 1.0099 | 1.3454 | 1.0696       |
| 4   | 0.8016                        | 1.0955 | 0.9492 | 0.9864 | 1.3854 | 1.0768       |
| 5   | 0.7854                        | 1.0965 | 0.9445 | 0.9675 | 1.4128 | 1.0819       |
| 6   | 0.7744                        | 1.0970 | 0.9411 | 0.9533 | 1.4326 | 1.0856       |
| 7   | 0.7667                        | 1.0974 | 0.9385 | 0.9430 | 1.4476 | 1.0885       |
| 8   | 0.7613                        | 1.0977 | 0.9364 | 0.9355 | 1.4593 | 1.0908       |
| 9   | 0.7573                        | 1.0979 | 0.9348 | 0.9298 | 1.4687 | 1.0926       |
| S/L | Dipropyl Sulfide/Styrene      |        |        |        |        |              |
|     | SUL                           | DMSO   | BAZ    | DEG    | NMP    | $\gamma$ -BL |
| 3   | 1.6236                        | 1.8663 | 1.1909 | 0.8763 | 1.7464 | 1.2128       |
| 4   | 1.7301                        | 1.9863 | 1.2098 | 0.7632 | 1.8572 | 1.2356       |
| 5   | 1.8121                        | 2.0722 | 1.2235 | 0.6626 | 1.9372 | 1.2521       |
| 6   | 1.8769                        | 2.1359 | 1.2338 | 0.6540 | 1.9972 | 1.2647       |
| 7   | 1.9293                        | 2.1847 | 1.2419 | 0.6483 | 2.0438 | 1.2745       |
| 8   | 1.9724                        | 2.2230 | 1.2484 | 0.6445 | 2.0809 | 1.2824       |
| 9   | 2.0083                        | 2.2536 | 1.2537 | 0.6420 | 2.1110 | 1.2888       |

**Table S6.** Orthogonal experimental design and simulation results.

| Factor | <i>A</i> | <i>B</i> | <i>C</i> | <i>D</i> | Empty | $y_1$ | $y_2$ | $y_3$  | $y_4$    |
|--------|----------|----------|----------|----------|-------|-------|-------|--------|----------|
| No.1   | 3        | 4.5      | 1500     | 3:7      | 1     | 88.91 | 7.75  | 332.25 | 11349.46 |
| No.2   | 3        | 5        | 3000     | 5:5      | 2     | 89.12 | 7.54  | 337.09 | 14070.09 |
| No.3   | 3        | 5.5      | 4500     | 7:3      | 3     | 89.51 | 7.16  | 199.22 | 16784.94 |
| No.4   | 3        | 6        | 6000     | 9:1      | 4     | 90.14 | 6.52  | 158.43 | 19490.92 |
| No.5   | 5        | 4.5      | 3000     | 7:3      | 4     | 93.64 | 2.97  | 10.46  | 14012.99 |
| No.6   | 5        | 5        | 1500     | 9:1      | 3     | 91.49 | 5.20  | 0.00   | 12912.50 |
| No.7   | 5        | 5.5      | 6000     | 3:7      | 2     | 95.32 | 1.22  | 334.95 | 19383.34 |
| No.8   | 5        | 6        | 4500     | 5:5      | 1     | 94.16 | 2.42  | 232.55 | 18272.81 |
| No.9   | 7        | 4.5      | 4500     | 9:1      | 2     | 96.34 | 0.27  | 0.03   | 16569.57 |
| No.10  | 7        | 5        | 6000     | 7:3      | 1     | 96.56 | 0.06  | 69.08  | 19309.92 |
| No.11  | 7        | 5.5      | 1500     | 5:5      | 4     | 95.27 | 1.35  | 0.52   | 14507.34 |
| No.12  | 7        | 6        | 3000     | 3:7      | 3     | 95.87 | 0.72  | 241.32 | 17205.51 |
| No.13  | 9        | 4.5      | 6000     | 5:5      | 3     | 96.68 | 0.01  | 170.86 | 19404.08 |
| No.14  | 9        | 5        | 4500     | 3:7      | 4     | 96.65 | 0.03  | 178.00 | 18434.95 |
| No.15  | 9        | 5.5      | 3000     | 9:1      | 1     | 96.28 | 0.41  | 0.00   | 17004.19 |
| No.16  | 9        | 6        | 1500     | 7:3      | 2     | 96.01 | 0.68  | 0.00   | 16019.34 |



**Table S7.** Analysis of extreme difference on styrene recovery.

| <b>Factor</b>         | <b><i>A</i></b>                                             | <b><i>B</i></b> | <b><i>C</i></b> | <b><i>D</i></b> |
|-----------------------|-------------------------------------------------------------|-----------------|-----------------|-----------------|
| <i>k</i> <sub>1</sub> | 89.42                                                       | 93.892          | 92.92           | 94.188          |
| <i>k</i> <sub>2</sub> | 93.653                                                      | 93.455          | 93.727          | 93.808          |
| <i>k</i> <sub>3</sub> | 96.01                                                       | 94.095          | 94.165          | 93.93           |
| <i>k</i> <sub>4</sub> | 96.405                                                      | 94.045          | 94.675          | 93.563          |
| <i>R</i> <sub>X</sub> | 6.985                                                       | 0.64            | 1.755           | 0.625           |
| Priority              | <i>A &gt; C &gt; B &gt; D</i>                               |                 |                 |                 |
| Optimal solution      | <i>A<sub>4</sub>B<sub>3</sub>C<sub>4</sub>D<sub>1</sub></i> |                 |                 |                 |

**Table S8.** Analysis of extreme difference on the o-xylene content.

| Factor                       | <i>A</i>                                                                                | <i>B</i> | <i>C</i> | <i>D</i> |
|------------------------------|-----------------------------------------------------------------------------------------|----------|----------|----------|
| <i>k</i> <sub>1</sub>        | 7.242                                                                                   | 2.75     | 3.745    | 2.43     |
| <i>k</i> <sub>2</sub>        | 2.953                                                                                   | 3.208    | 2.91     | 2.83     |
| <i>k</i> <sub>3</sub>        | 0.6                                                                                     | 2.535    | 2.47     | 2.718    |
| <i>k</i> <sub>4</sub>        | 0.282                                                                                   | 2.585    | 1.952    | 3.1      |
| <i>R</i> <sub><i>X</i></sub> | 6.96                                                                                    | 0.673    | 1.793    | 0.67     |
| Priority                     | <i>D&gt;A&gt;C&gt;B</i>                                                                 |          |          |          |
| Optimal solution             | <i>A</i> <sub>3</sub> <i>B</i> <sub>1</sub> <i>C</i> <sub>1</sub> <i>D</i> <sub>4</sub> |          |          |          |

**Table S9.** Analysis of extreme difference on the organic sulfur content.

| <b>Factor</b>                | <b><i>A</i></b>                                                                         | <b><i>B</i></b> | <b><i>C</i></b> | <b><i>D</i></b> |
|------------------------------|-----------------------------------------------------------------------------------------|-----------------|-----------------|-----------------|
| <i>k</i> <sub>1</sub>        | 256.748                                                                                 | 128.4           | 83.192          | 271.63          |
| <i>k</i> <sub>2</sub>        | 144.49                                                                                  | 146.042         | 147.217         | 185.255         |
| <i>k</i> <sub>3</sub>        | 77.737                                                                                  | 133.672         | 152.45          | 69.69           |
| <i>k</i> <sub>4</sub>        | 87.215                                                                                  | 158.075         | 183.33          | 39.615          |
| <i>R</i> <sub><i>X</i></sub> | 179.011                                                                                 | 29.675          | 100.138         | 232.015         |
| Priority                     | <i>A &gt; C &gt; B &gt; D</i>                                                           |                 |                 |                 |
| Optimal solution             | <i>A</i> <sub>4</sub> <i>B</i> <sub>3</sub> <i>C</i> <sub>4</sub> <i>D</i> <sub>1</sub> |                 |                 |                 |

**Table S10.** Analysis of extreme difference on the energy consumption.

| Factor           | <i>A</i>          | <i>B</i> | <i>C</i> | <i>D</i> |
|------------------|-------------------|----------|----------|----------|
| $k_1$            | 15423.85          | 15334.03 | 13697.16 | 16593.32 |
| $k_2$            | 16145.41          | 16181.87 | 15573.2  | 16563.58 |
| $k_3$            | 16898.09          | 16919.95 | 17515.57 | 16531.8  |
| $k_4$            | 17715.64          | 17747.15 | 19397.07 | 16494.3  |
| $R_X$            | 2291.788          | 2413.12  | 5699.905 | 99.02    |
| Priority         | $C > B > A > D$   |          |          |          |
| Optimal solution | $A_1 B_1 C_1 D_4$ |          |          |          |

$k_i$  represents the average purity of styrene at the level  $i$  under the same factors. The extreme difference,  $R_X$ , is the difference between the maximum and minimum values of the mean product purity under the four factors of  $A$ ,  $B$ ,  $C$ , and  $D$ .

**Table S11.** ANOVA of  $y_2$ ,  $y_3$ , and  $y_4$ .

|       | Factors      | <i>A</i> | <i>B</i> | <i>C</i>   | <i>D</i>  | Error    | Total       |
|-------|--------------|----------|----------|------------|-----------|----------|-------------|
| $y_2$ | <i>S-S</i>   | 123.73   | 1.13     | 6.91       | 0.92      | 1.54     | 134.23      |
|       | <i>DOF</i>   | 3.00     | 3.00     | 3.00       | 3.00      | 3.00     | 15.00       |
|       | <i>F</i>     | 80.40    | 0.73     | 4.49       | 0.60      |          |             |
|       | Significance | **       |          |            |           |          |             |
| $y_3$ | <i>S-S</i>   | 81213.74 | 2112.04  | 21208.39   | 137542.15 | 16425.29 | 258501.61   |
|       | <i>DOF</i>   | 3.00     | 3.00     | 3.00       | 3.00      | 3.00     | 15.00       |
|       | <i>F</i>     | 4.94     | 0.13     | 1.29       | 8.37      |          |             |
|       | Significance |          |          |            | *         |          |             |
| $y_4$ | <i>S-S</i>   | 11626835 | 12736269 | 72523485.7 | 21690.51  | 41316.09 | 96949595.93 |
|       | <i>DOF</i>   | 3        | 3        | 3          | 3         | 3        | 15          |
|       | <i>F</i>     | 281.41   | 308.26   | 1755.33    | 0.52      |          |             |
|       | Significance | **       | **       | **         |           |          |             |

The regression equations for  $y_2$ ,  $y_3$ , and  $y_4$  are presented in **Eq. S1~S3**.

$$y_2 = 11.945 - 1.162 * A - 0.233 * B - 0.000 * C + 0.190 * D \quad (S1)$$

$$y_3 = 360.156 - 28.767 * A + 15.331 * B + 0.020 * C - 81.161 * D \quad (S2)$$

$$y_4 = 1202.705 + 381.402 * A + 1595.489 * B + 1.269 * C - 32.884 * D \quad (S3)$$

**Tables S12–S14** list the results of the regression model analysis for  $y_2$ ,  $y_3$ , and  $y_4$ , where the  $R^2$  values of the models are greater than 0.8 and the  $VIF$  values are less than 5. These findings indicate that the regression model is statistically significant and there are no issues with collinearity. The effect of  $A$  on  $y_2$  will be significantly negative.  $C$  has a significant positive effect on  $y_3$ , while  $A$  and  $D$  have a significantly negative effect on  $y_3$ .  $A$ ,  $B$ , and  $C$  have a significantly positive effect on  $y_4$ .

**Table S12.** Linear regression analysis of  $y_2$ 

|          | Non-standardized coefficient |                | $t$    | $p$   | $VIF$ |
|----------|------------------------------|----------------|--------|-------|-------|
|          | $B$                          | Standard error |        |       |       |
| Constant | 11.945                       | 3.346          | 3.57   | <0.01 | -     |
| $A$      | -1.162                       | 0.145          | -8.007 | <0.01 | 1     |
| $B$      | -0.233                       | 0.58           | -0.402 | 0.695 | 1     |
| $C$      | 0                            | 0              | -2.005 | 0.07  | 1     |
| $D$      | 0.19                         | 0.29           | 0.654  | 0.527 | 1     |
| $R^2$    | 0.862                        |                |        |       |       |
| $F$      | $F(4,7)=17.179, p=0.000$     |                |        |       |       |

**Table S13.** Linear regression analysis of  $y_3$ 

|          | Non-standardized coefficient |                | $t$    | $p$   | $VIF$ |
|----------|------------------------------|----------------|--------|-------|-------|
|          | $B$                          | Standard error |        |       |       |
| Constant | 360.156                      | 156.852        | 2.296  | <0.05 | -     |
| $A$      | -28.767                      | 6.8            | -4.23  | <0.01 | 1     |
| $B$      | 15.331                       | 27.202         | 0.564  | 0.584 | 1     |
| $C$      | 0.02                         | 0.009          | 2.247  | <0.05 | 1     |
| $D$      | -81.161                      | 13.601         | -5.967 | <0.01 | 1     |
| $R^2$    | 0.843                        |                |        |       |       |
| $F$      | $F(4,7)=14.718, p=0.000$     |                |        |       |       |



**Table S14.** Linear regression analysis of  $y_4$ 

|          | Non-standardized coefficient   |                | $t$     | $p$   | $VIF$ |
|----------|--------------------------------|----------------|---------|-------|-------|
|          | $B$                            | Standard error |         |       |       |
| Constant | 1202.705                       | 194.263        | 6.191   | <0.01 | -     |
| $A$      | 381.402                        | 8.422          | 45.284  | <0.01 | 1     |
| $B$      | 1595.489                       | 33.69          | 47.359  | <0.01 | 1     |
| $C$      | 1.269                          | 0.011          | 113.044 | <0.01 | 1     |
| $D$      | -32.884                        | 16.845         | -1.952  | 0.077 | 1     |
| $R^2$    | 0.999                          |                |         |       |       |
| $F$      | $F(4,7) = 4269.090, p = 0.000$ |                |         |       |       |
